# Supplementary material for: TEAD2 initiates ground-state pluripotency by mediating chromatin looping
Source: PubMed Central journal article supplement (PMC11099042; doi:10.1038/s44318-024-00086-5), 2024-04-11
Supplement: 44318_2024_86_MOESM1_ESM.pdf [file 44318_2024_86_MOESM1_ESM.pdf]

# Appendix

## TEAD2 initiates ground-state pluripotency by mediating chromatin looping

### Table of contents:

|                                                                                                                                                                    |    |
|--------------------------------------------------------------------------------------------------------------------------------------------------------------------|----|
| <b>Appendix Figure S1.</b> TEAD2 has no effect on the core pluripotency establishment of ESCs. ....                                                                | 2  |
| <b>Appendix Figure S2.</b> Knockout of <i>Tead2</i> leads to an abnormal phenotype that can be maintained for an extended period during SL-to-2iL transition. .... | 4  |
| <b>Appendix Figure S3.</b> <i>Tead2</i> overexpression endows SL-ESCs with the expression of partial 2i-specific genes. ....                                       | 6  |
| <b>Appendix Figure S4.</b> Analysis of BL-Hi-C data. ....                                                                                                          | 8  |
| <b>Appendix Figure S5.</b> Supplementary data of ChIP-seq experiments. ....                                                                                        | 10 |
| <b>Appendix Figure S6.</b> Supplementary data of the QHR-4C experiments. ....                                                                                      | 12 |
| <b>Appendix Figure S7.</b> TEAD4 and TEAD2 are not redundant during SL-to-2iL transition. ....                                                                     | 14 |
| <b>Appendix Figure S8.</b> Supplementary data for the DISCUSSION section. ....                                                                                     | 16 |

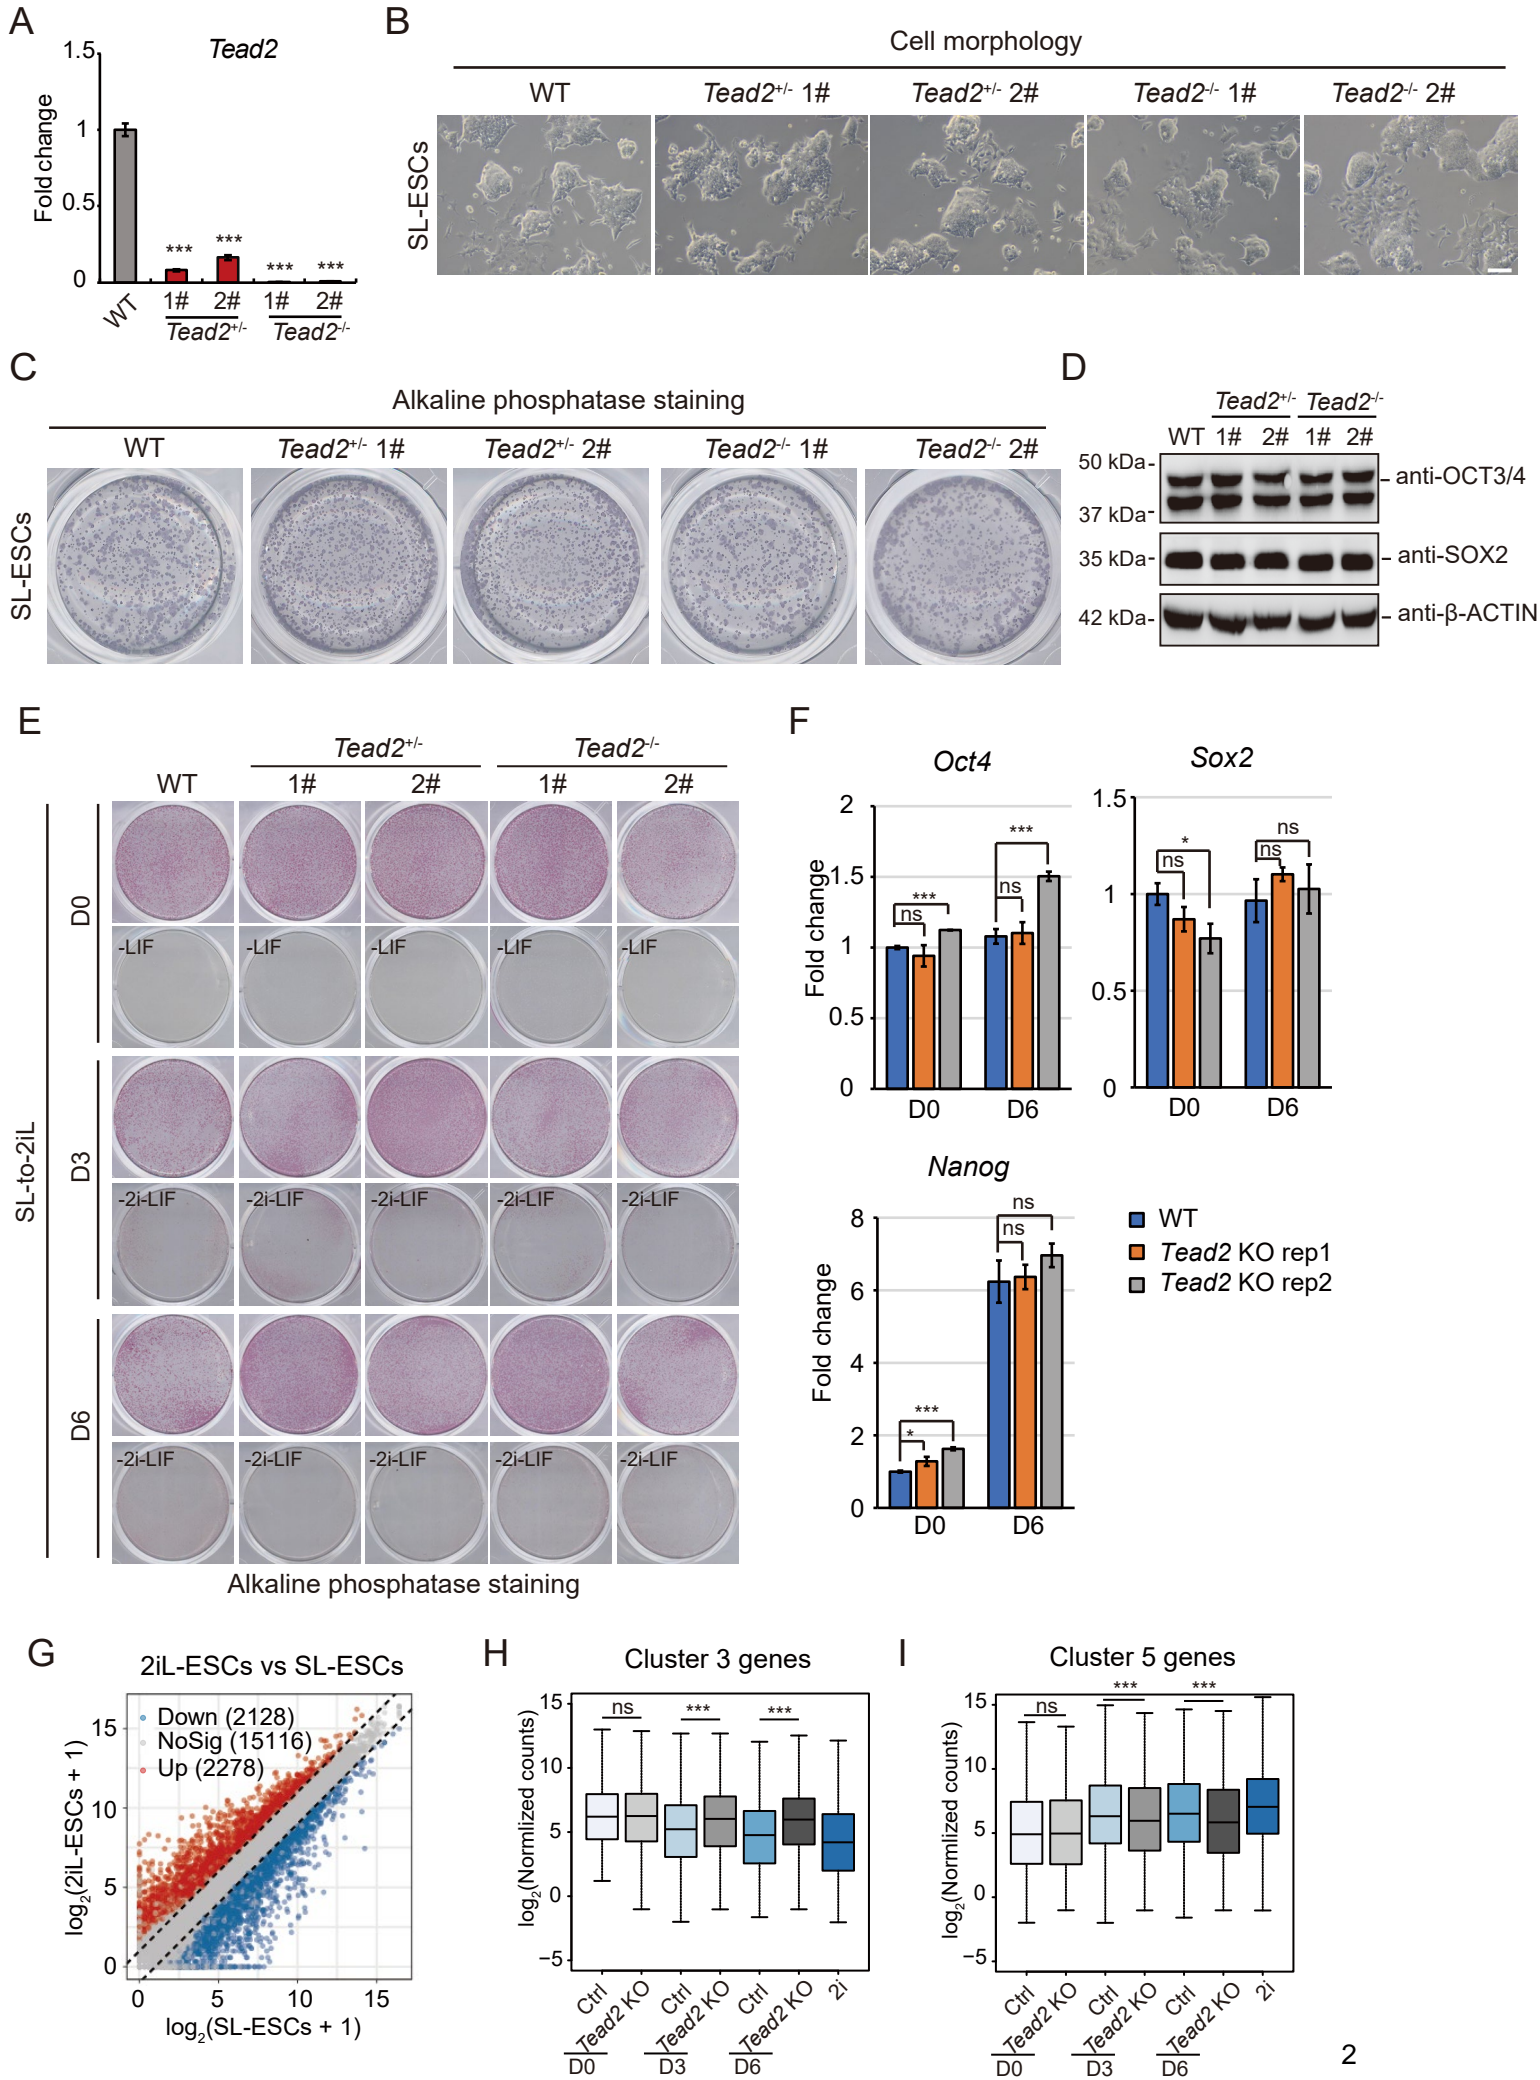

**Appendix Figure S1. TEAD2 has no effect on the core pluripotency establishment of ESCs.**

- A. RT-qPCR testing the expression of *Tead2* in *Tead2*<sup>-/-</sup> and *Tead2*<sup>+/-</sup> SL-ESCs clones. Data are presented as the mean  $\pm$  SD. *P*-values were determined by two-sided Student's *t*-test (\*\**p* < 0.001). *n* = 3 biological replicates.
- B. Cellular morphology analysis of  $1 \times 10^5$  *Tead2*<sup>-/-</sup> and *Tead2*<sup>+/-</sup> SL-ESCs grown on a 6-well plate coated with gelatin for three days. Scale bar, 100  $\mu$ m.
- C. AP-stained wells of *Tead2*<sup>-/-</sup> and *Tead2*<sup>+/-</sup> SL-ESCs after 5 days of culture.
- D. Western blot analysis of the OCT4 and SOX2 protein levels in wild-type, *Tead2*<sup>-/-</sup>, and *Tead2*<sup>+/-</sup> SL-ESCs.
- E. Representative images of AP staining of wild-type and *Tead2*-knockout cells that were adapted to 2i conditions for days 0, 3, and 6. Cells were then induced for 5 days of differentiation in medium in the absence of LIF or 2i with LIF.
- F. RT-qPCR testing the expression of pluripotent genes in wild-type and *Tead2*-knockout cells on day 0 and day 6 of the transition. Data are presented as the mean  $\pm$  SD. Indicated significances are testing using Student's *t*-test analyses (\**p* < 0.05, \*\*\**p* < 0.001). *n* = 3 biological replicates.
- G. Volcano plots showing differential gene expression (fold change > 2; *q*-value < 0.05) between 2iL-ESCs and SL-ESCs.
- H and I. Boxplots showing expression level of genes in cluster 3 (H) and cluster 5 (I) between wild-type and *Tead2*-knockout cells at day 0, 3, and 6 of the transition and 2iL-ESCs. The centerline indicates the median value, while the box and whiskers represent the interquartile range (IQR) and  $1.5 \times$  IQR, respectively, *n* = 472 in (H), *n* = 1,210 in (I). \*\*\**p* < 0.001. *P*-value was calculated by using Mann-Whitney U test.

# Appendix Figure S2

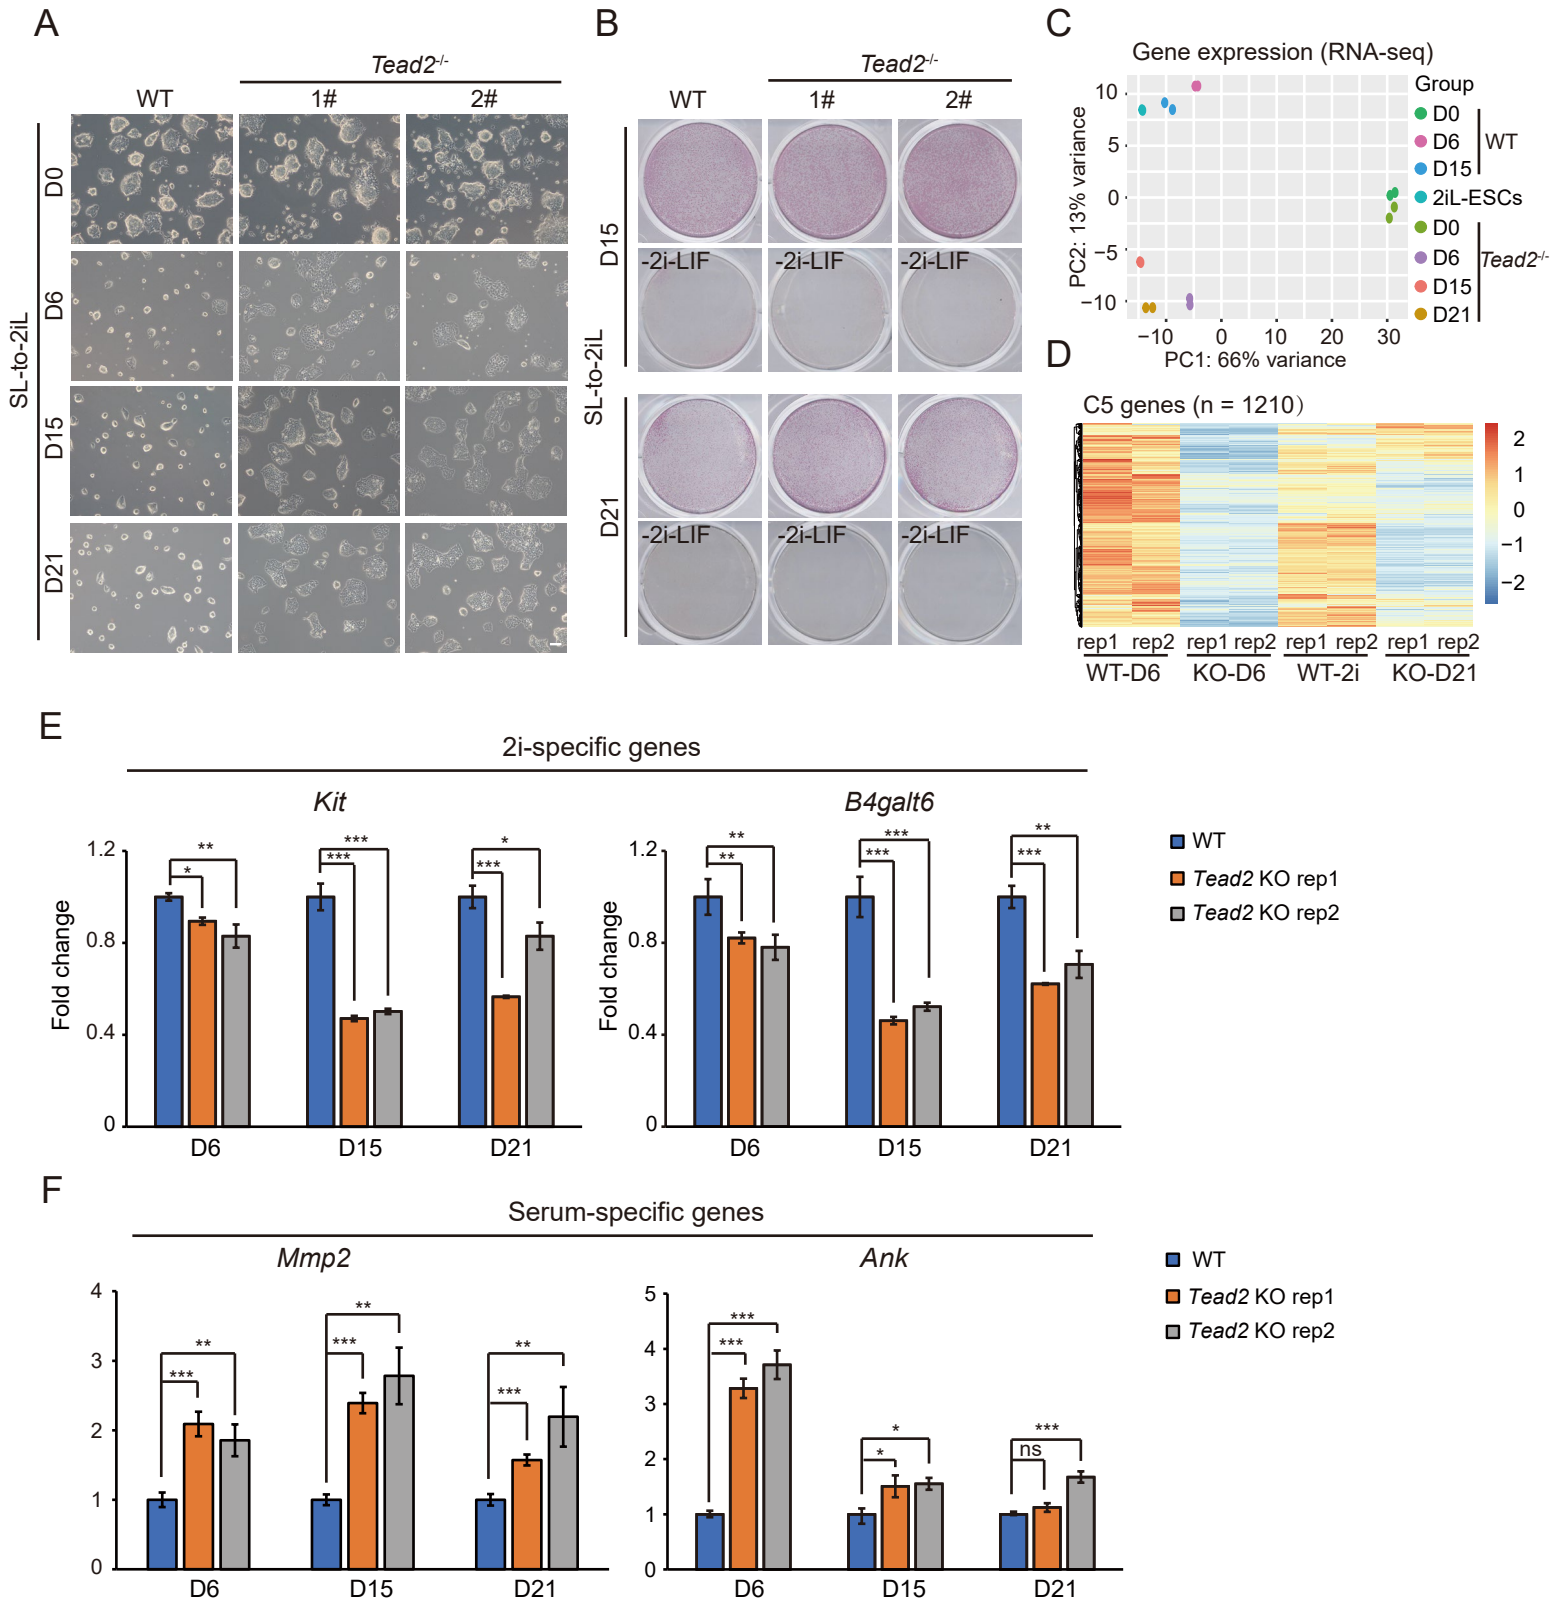

**Appendix Figure S2. Knockout of *Tead2* leads to an abnormal phenotype that can be maintained for an extended period during SL-to-2iL transition.**

- A. Representative cellular morphology of wild-type ESCs and *Tead2*-knockout ESCs during the SL-to-2iL transition at days 0, 6, 15, and 21. Scale bar, 100  $\mu\text{m}$ .
- B. Representative images of AP staining of wild-type and *Tead2*-knockout cells that were adapted to 2i conditions for 15 and 21 days. Cells were then induced for differentiation for 5 days in medium in the absence of LIF or 2i with LIF.
- C. PCA of the RNA-seq data from wild-type ESCs and *Tead2*-knockout ESCs collected at different time points during the SL-to-2iL transition.
- D. Heatmap showing the expression of cluster 5 genes in wild-type and *Tead2*-knockout cells on day 6 and 21 during the transition.
- E and F. RT-qPCR testing the expression of 2i-specific genes (E) and serum-specific genes (F) in wild-type and *Tead2*-knockout cells on days 6, 15, and 21 of the transition. Data are presented as the mean  $\pm$  SD. Indicated significances are tested using Student's *t*-test analyses ( $*p < 0.05$ ,  $**p < 0.01$ ,  $***p < 0.001$ ).  $n = 3$  biological replicates. The fold changes of these specific gene expressions after knocking *Tead2* out were calculated by using the wild-type of D6, D15, and D21 as controls, respectively.

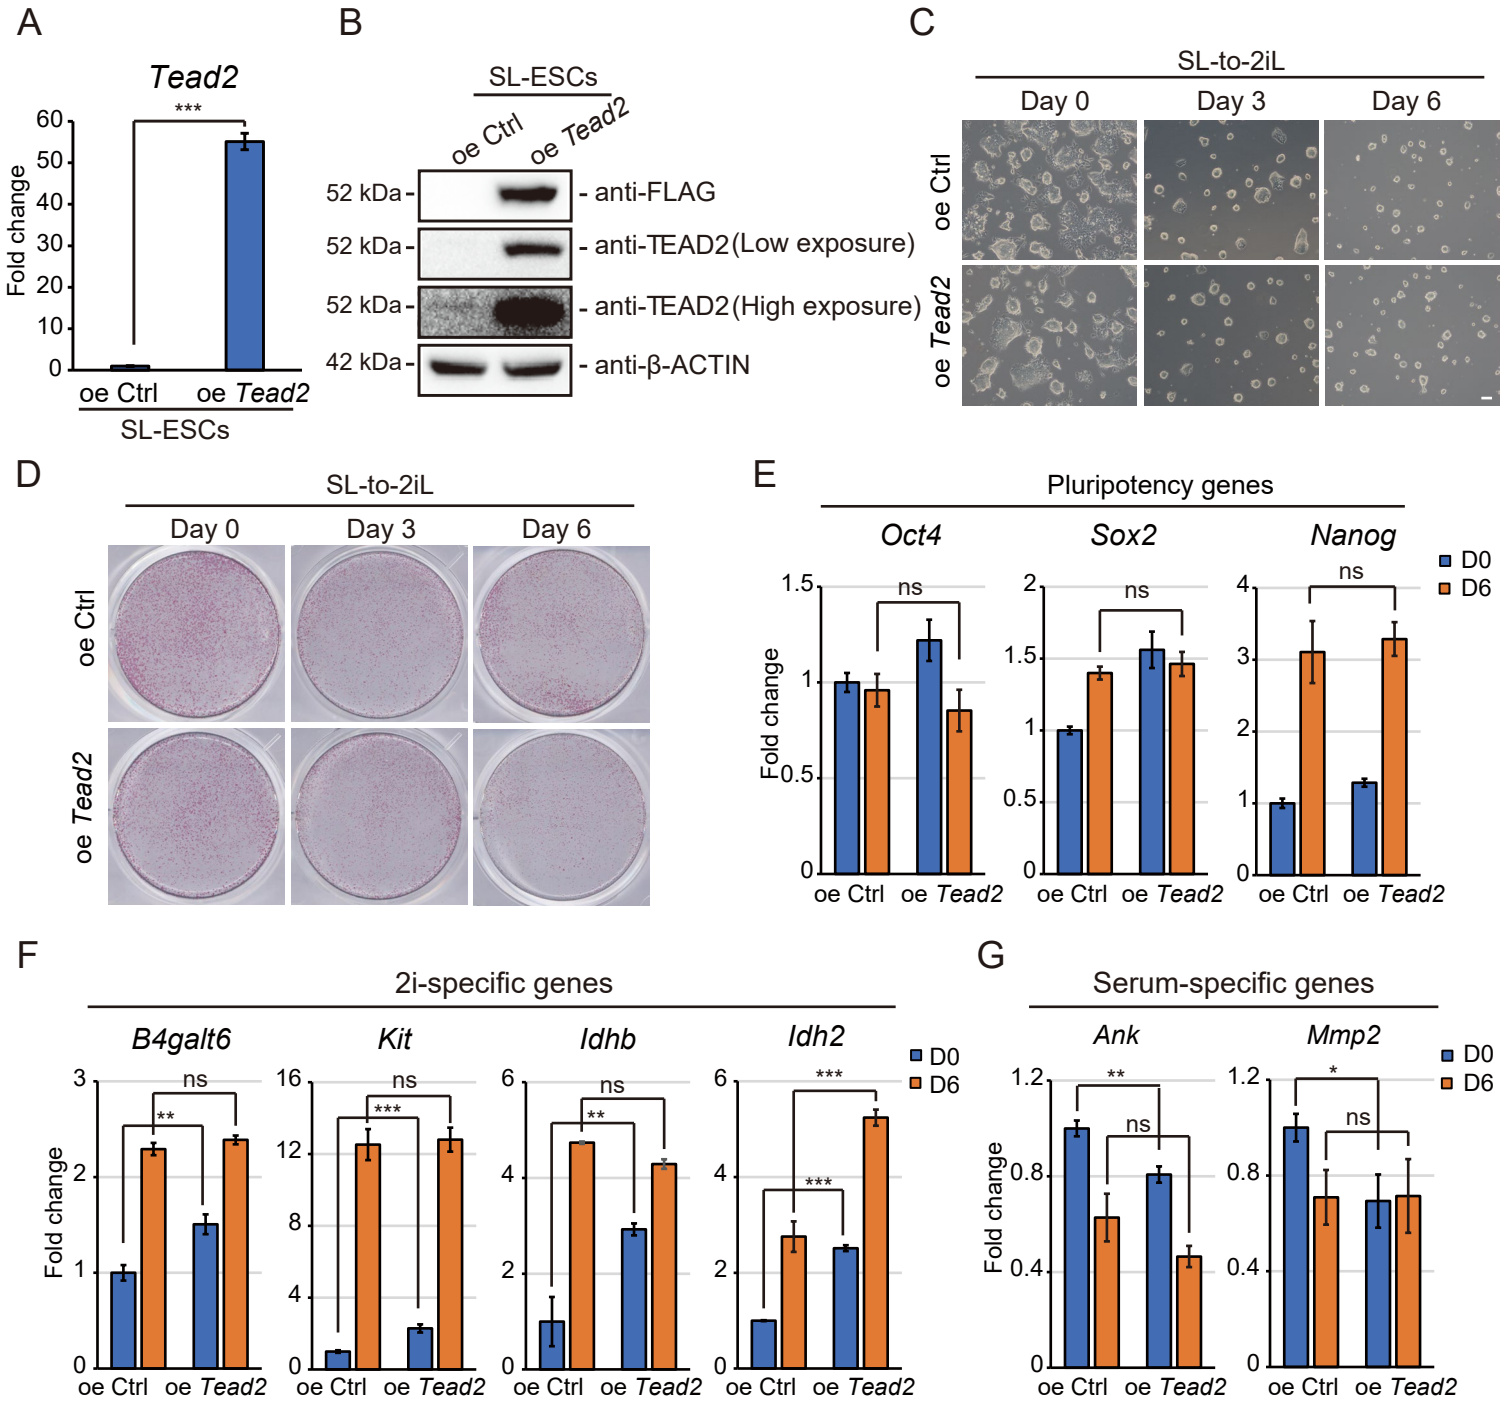

**Appendix Figure S3. *Tead2* overexpression endows SL-ESCs with the expression of partial 2i-specific genes.**

A and B. RT-qPCR (A) and Western blot (B) analysis examining *Tead2* overexpression in SL-ESCs. Data are presented as the mean  $\pm$  SD. Indicated significances are tested using Student's *t*-test analyses ( $***p < 0.001$ ).  $n = 3$  biological replicates.

C. Representative cellular morphology of ESC colonies with the Flag control and Flag-*Tead2* overexpression during the SL-to-2iL transition at days 0, 3, and 6, respectively. Scale bar, 100  $\mu\text{m}$ .

D. Representative images of AP staining of the cells with the Flag control and Flag-*Tead2* overexpression that were adapted to 2i conditions for 0, 3, and 6 days.

E-G. RT-qPCR analysis testing the expression of pluripotency genes (E), 2i-specific genes (F), and serum-specific genes (G) in Flag control and Flag-*Tead2* overexpression cells on day 0 and day 6 of the transition. Data are presented as the mean  $\pm$  SD. Indicated significances are tested using Student's *t*-test analysis ( $*p < 0.05$ ,  $**p < 0.01$ ,  $***p < 0.001$ ).  $n = 3$  biological replicates.

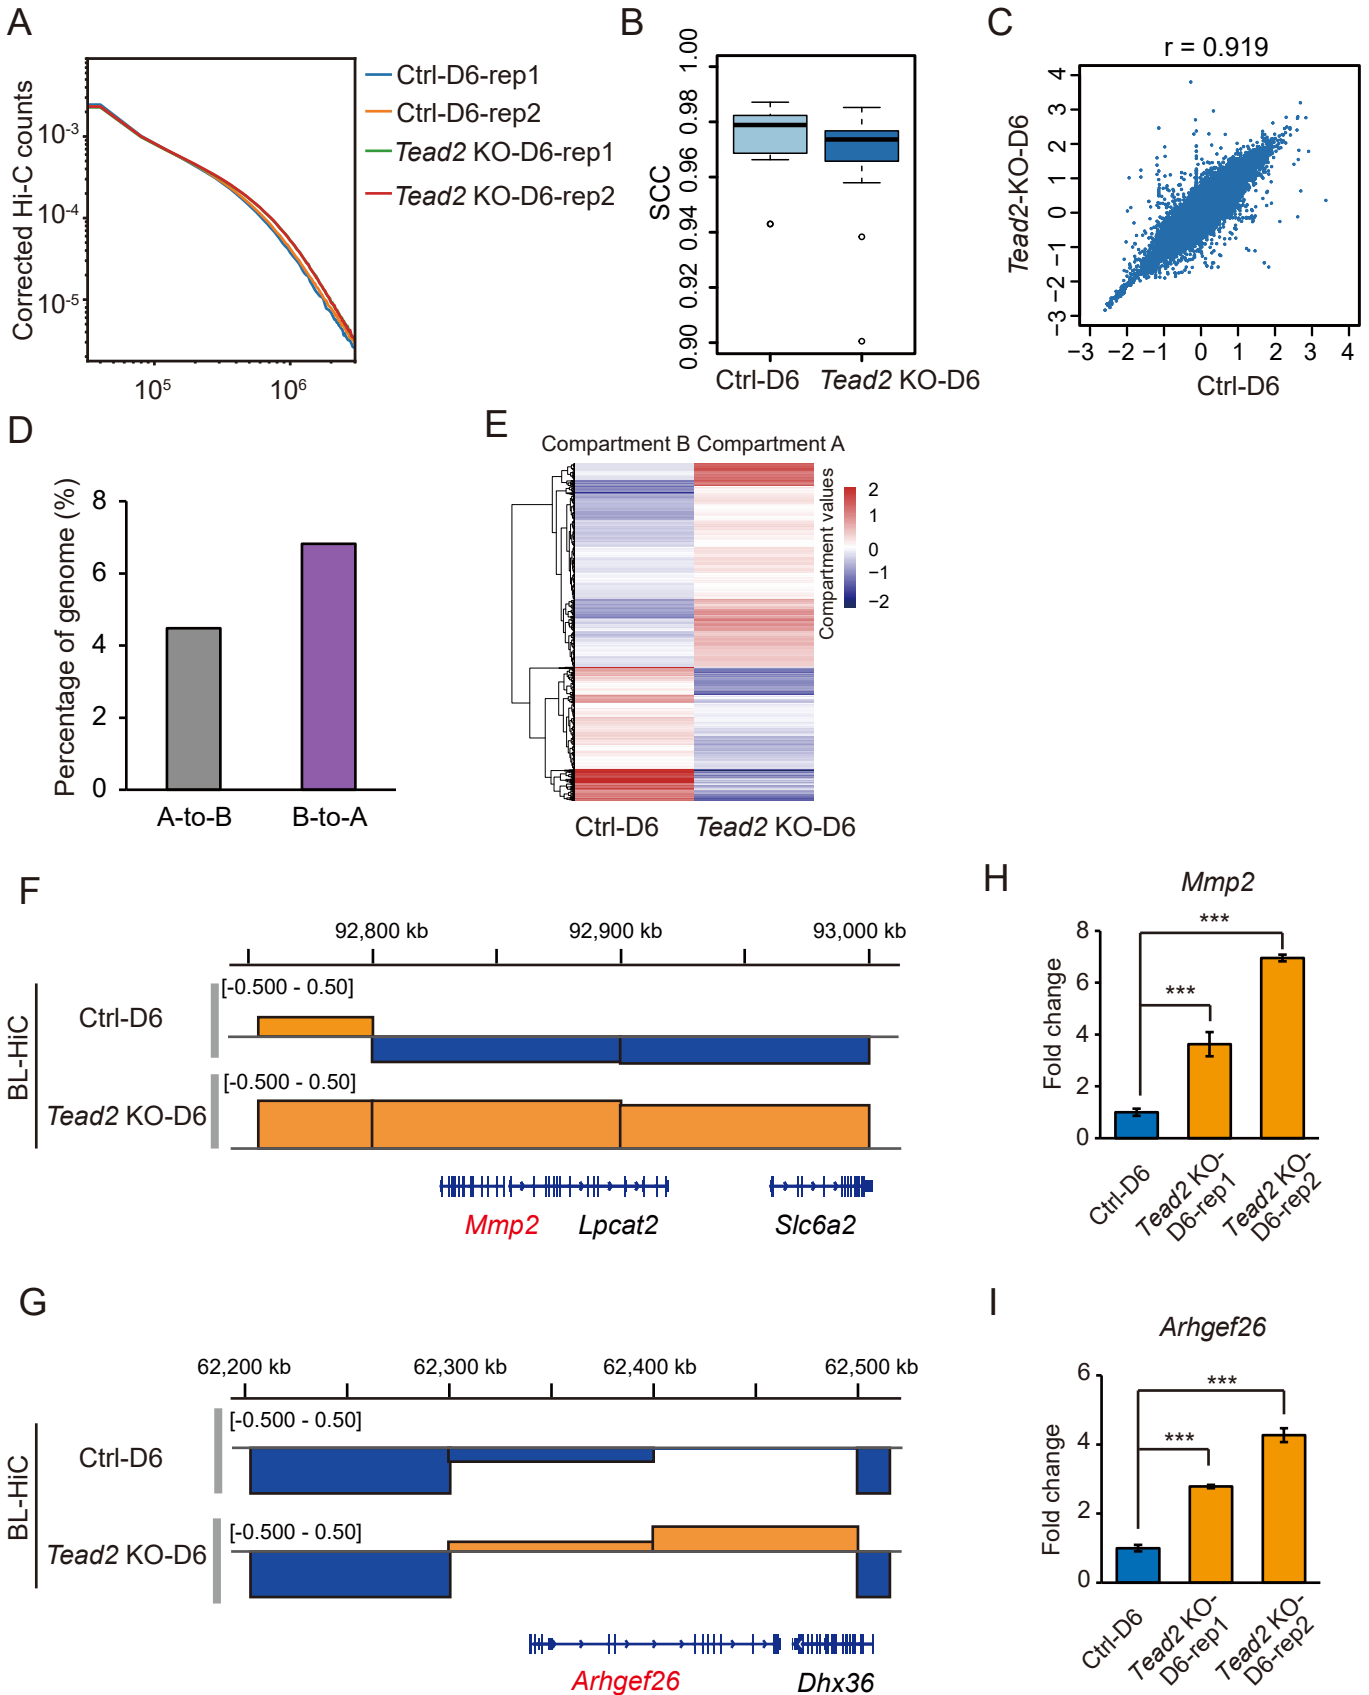



#### Appendix Figure S4. Analysis of BL-Hi-C data.

- A. Contact frequency distance curves obtained from BL-Hi-C data from both wild-type and *Tead2*-knockout cells at day 6 of the SL-to-2iL transition (n = 2 biological replicates).
- B. Boxplots showing reproducibility measured as SCC scores for all pairs of replicates. The centerline indicates the median value, while the box and whiskers represent the interquartile range (IQR) and  $1.5 \times \text{IQR}$ , respectively. n = 22.
- C. TAD analysis of wild-type and *Tead2*-knockout cells at day 6 of the SL-to-2iL transition.
- D. Barplots showing the percentage of A/B compartment switches between wild-type and *Tead2*-knockout cells at day 6 of the SL-to-2iL transition.
- E. Heatmaps showing the A/B compartment shifted regions between wild-type and *Tead2*-knockout cells at day 6 of the SL-to-2iL transition.
- F and G. A/B compartment analysis at *Mmp2* (F) and *Arhgef26* (G) loci in both wild-type and *Tead2*-knockout cells at day 6 of the SL-to-2iL transition from BL-Hi-C experiments.
- H and I. RT-qPCR detecting the expression levels of *Mmp2* (H) and *Arhgef26* (I) genes. Data are presented as the mean  $\pm$  SD. *P*-values were determined by two-sided Student's *t*-test (\*\**p* < 0.001). n = 3 biological replicates.

A

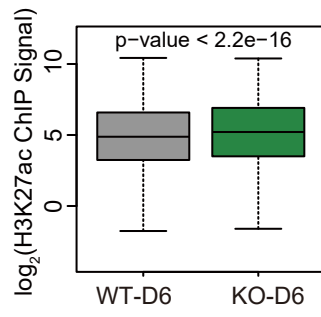

B

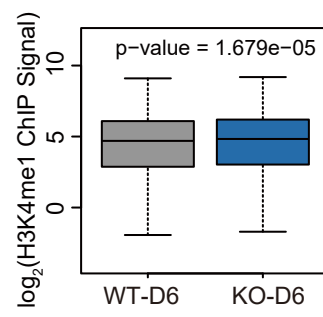

**Appendix Figure S5. Supplementary data of CHIP-seq experiments.**

A and B. Boxplots showing the CUT&Tag signal of both H3K27ac (A) and H3K4me1 (B) at TEAD2 binding sites in wild-type and *Tead2*-knockout cells, respectively, at day 6 of the SL-to-2iL transition. The centerline indicates the median value, while the box and whiskers represent the interquartile range (IQR) and  $1.5 \times \text{IQR}$ , respectively.  $n = 10,315$ . *P*-value was calculated by using Mann-Whitney U test.

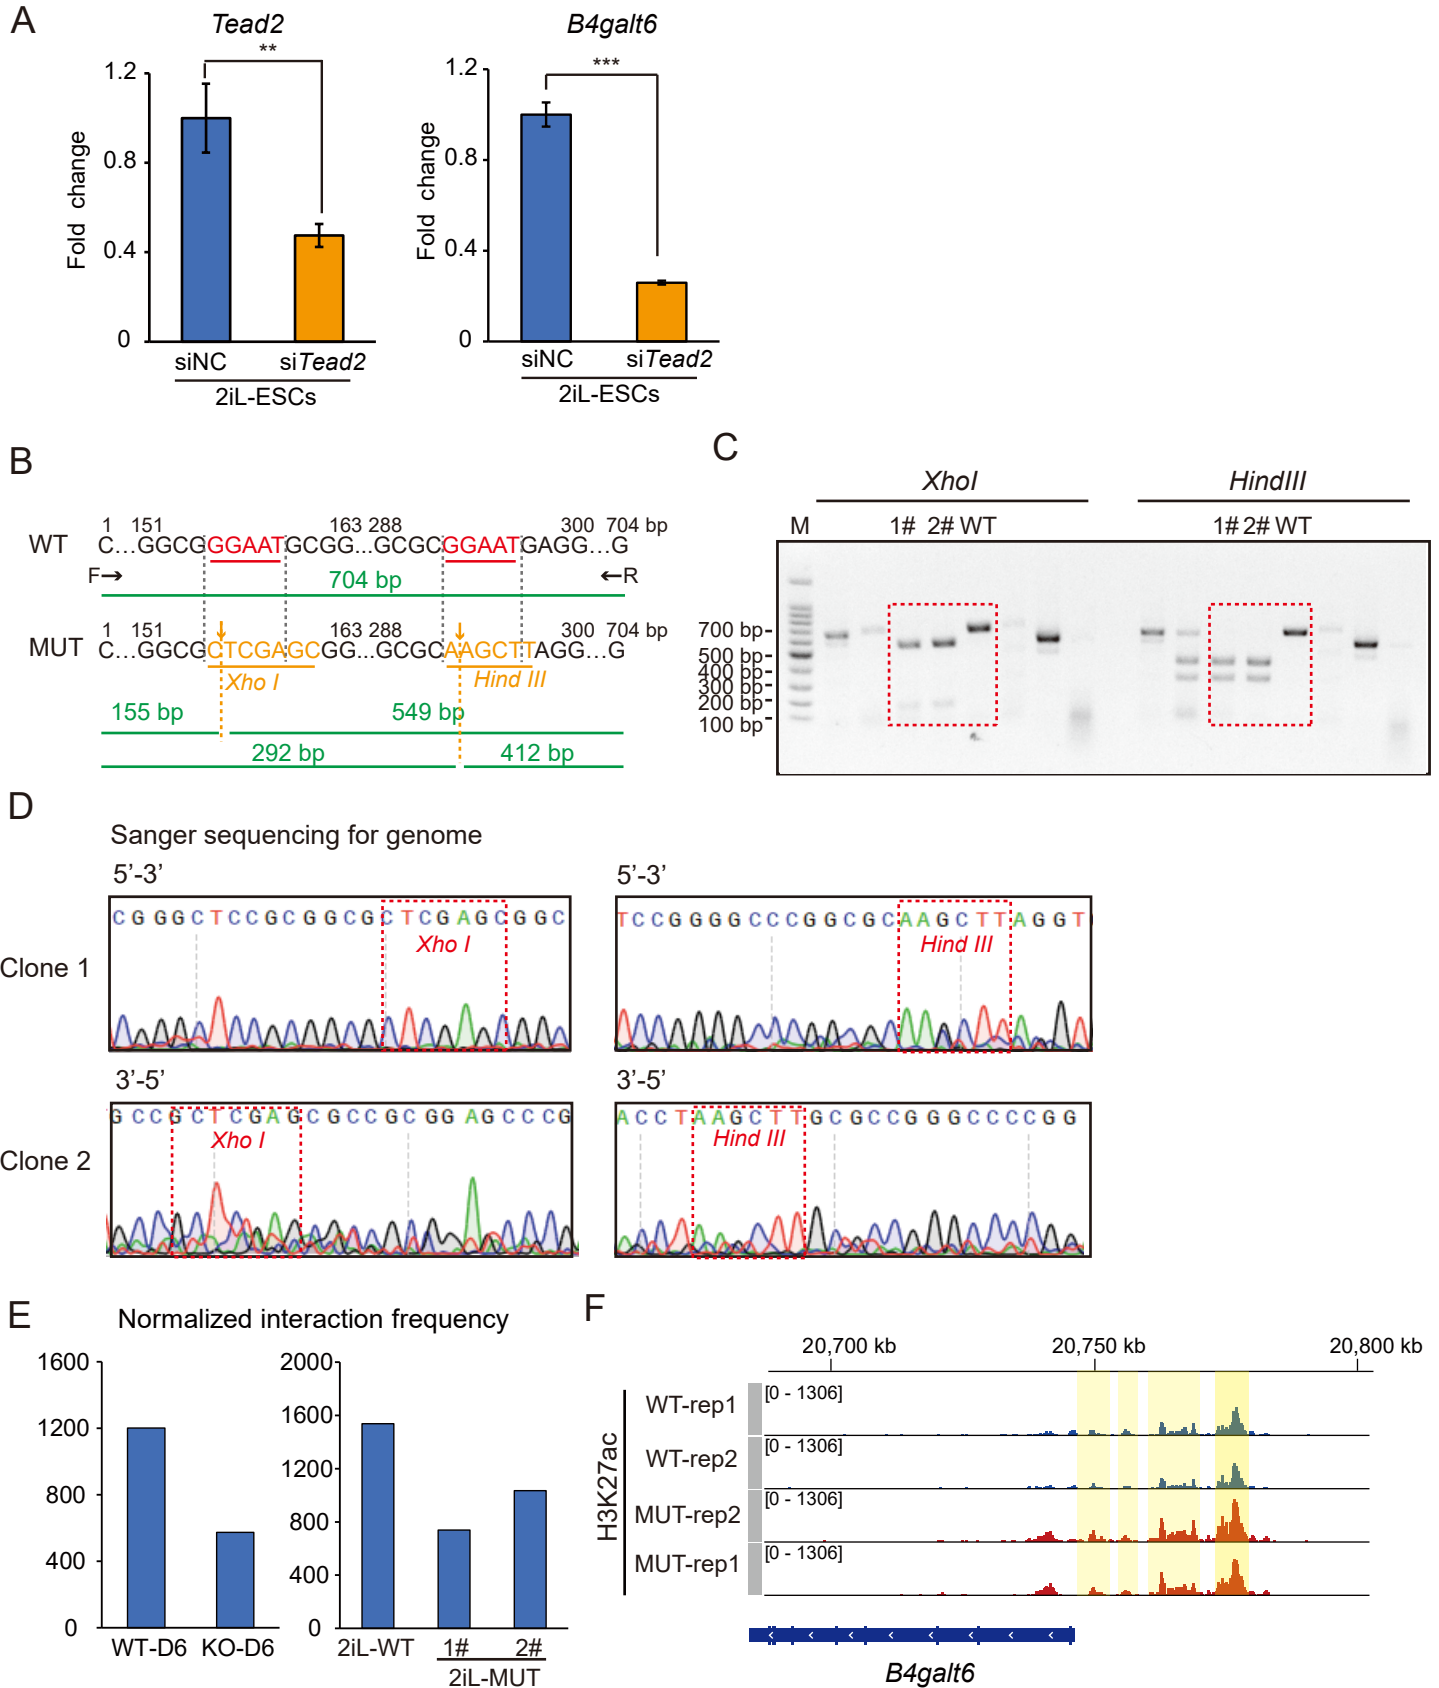

**Appendix Figure S6. Supplementary data of the QHR-4C experiments.**

- A. RT-qPCR determining the expression of *Tead2* and *B4galt6* in 2iL-ESCs. Data are presented as the mean  $\pm$  SD. Indicated significances are tested using Student's *t*-test analysis (\*\* $p < 0.01$ , \*\*\* $p < 0.001$ ).  $n = 3$  biological replicates.
- B. Restriction enzyme digestion strategy for identifying mutant clones.
- C. Genomic PCR and enzyme digestion to verify corrected clones.
- D. Sanger sequencing testing the region containing two TEAD2 motifs in wild-type and two homozygous mutant clones of 2iL-ESCs.
- E. Barplot showing the normalized interaction frequency between the promoters and enhancers of *B4galt6* in wild-type and two mutant 2iL-ESCs, wild-type and *Tead2*-knockout cells at day 6 of the transition.
- F. Genomic views of enrichment for H3K27ac at the *B4galt6* gene in wild-type and two homozygous mutant clones of 2iL-ESCs.

# Appendix Figure S7

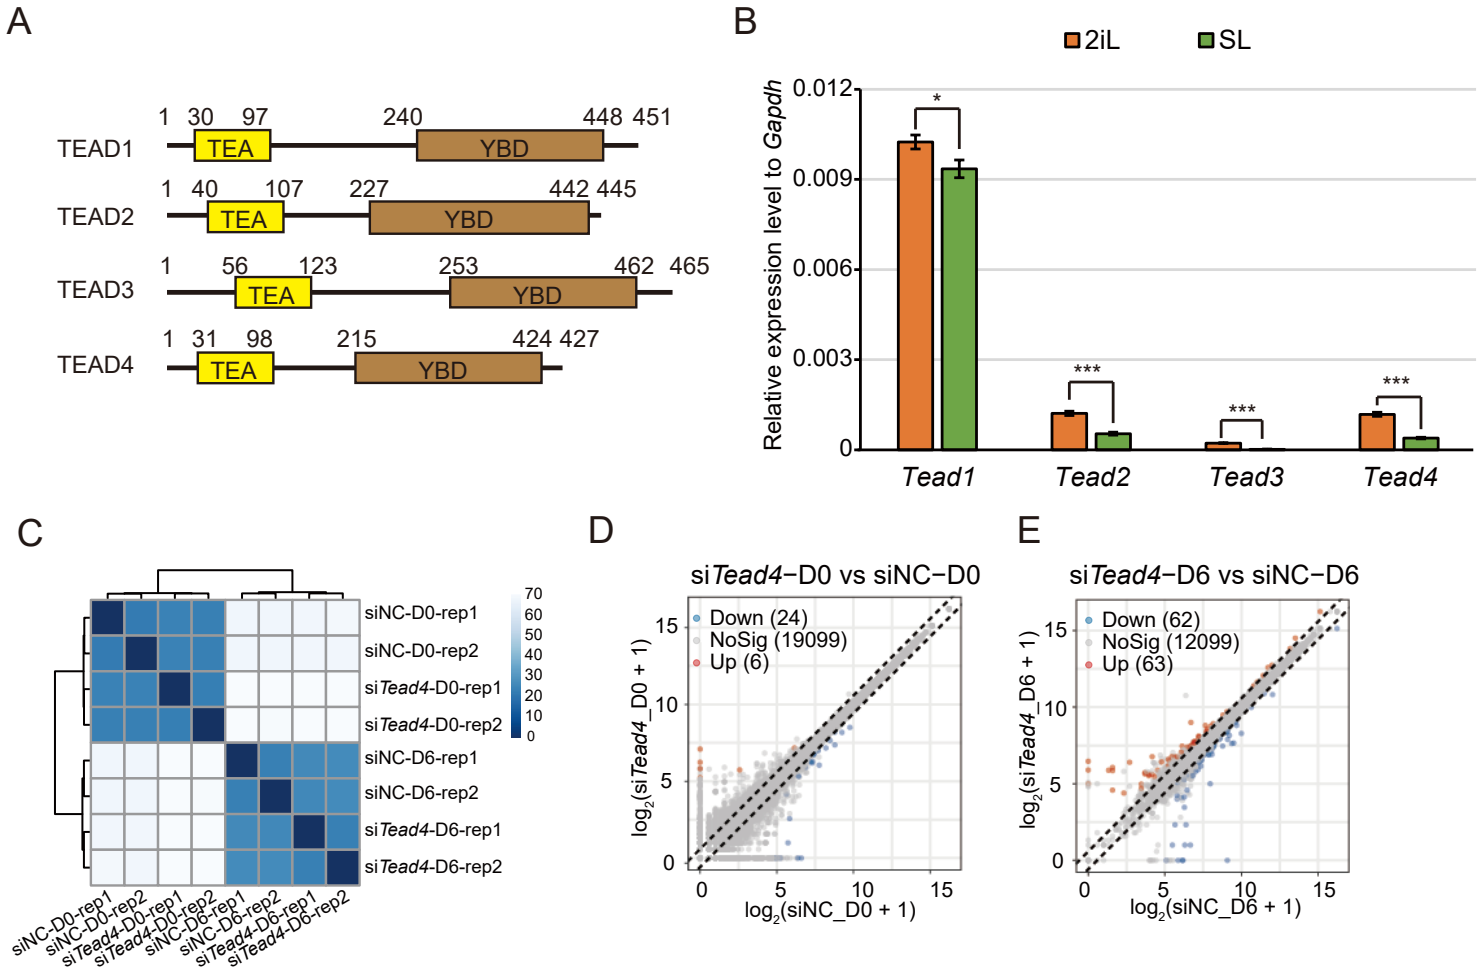

**Appendix Figure S7. TEAD4 and TEAD2 are not redundant during SL-to-2iL transition.**

- A. Schematic of the overall structure of the mammalian TEAD factors. The four TEADs present an overall homology and are divided into a TEA domain at the N-terminus (67 aa) and a C-terminal YAP/TAZ binding domain (YBD) (about 215 aa). Both domains are linked by a sequence of about 117–143 amino acids which has a low homology across the four TEADs. TEA: TEA DNA binding domain. YBD: YAP binding domain.
- B. RT-qPCR analysis testing the expression of *Tead1-4* in 2iL- and SL-ESCs. Data are presented as the mean  $\pm$  SD. Indicated significances are tested using Student's *t*-test analyses ( $*p < 0.05$ ,  $***p < 0.001$ ).  $n = 3$  biological replicates.
- C. Hierarchical cluster analysis (HCA) and heatmaps of control and *Tead4*-depleted cells at day 0 and day 6 of the transition. The heatmaps were based on  $\log_2$ -transformed and DESeq2-normalized expression data. The color key shows the Euclidean distances between samples.
- D and E. Volcano plots showing differential gene expression (fold change  $> 2$ ;  $q$ -value  $< 0.05$ ) between control and *Tead4*-depleted cells at day 0 (D) and day 6 (E) of the SL-to-2iL transition.

# Appendix Figure S8

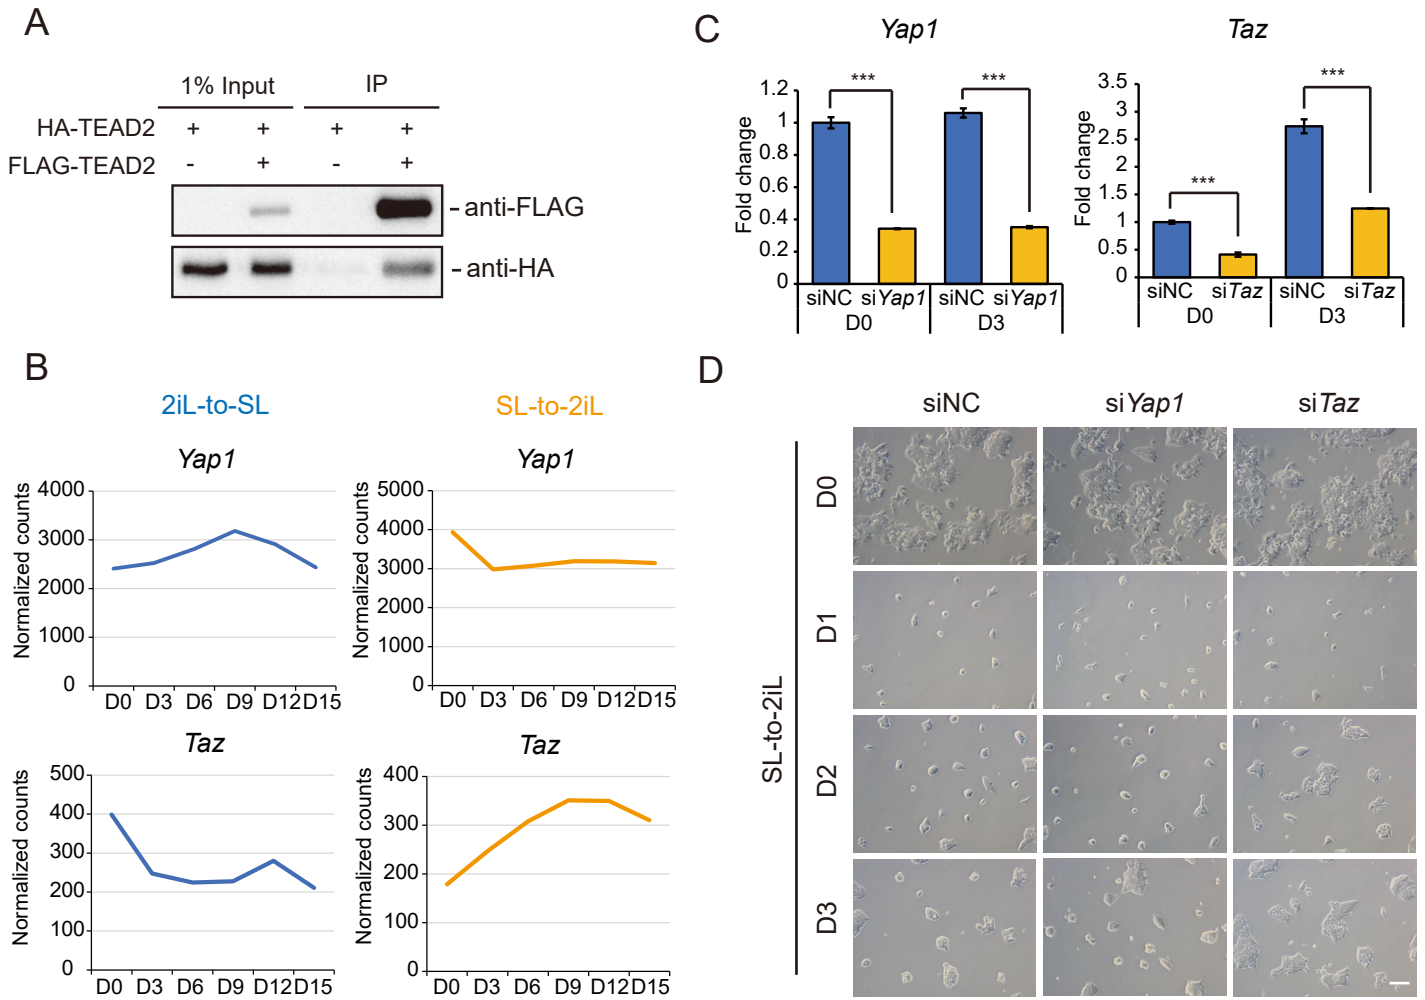



**Appendix Figure S8. Supplementary data for the DISCUSSION section.**

- A. Western blot showing FLAG-immunoprecipitation of FLAG-tagged TEAD2 and HA-tagged TEAD2 protein from the transfected cells.
- B. Expression patterns for *Yap1* and *Taz* during the conversion between 2iL-ESCs and SL-ESCs.
- C. RT-qPCR testing knockdown efficiencies for *Yap1* and *Taz* during the SL-to-2iL transition. Cells were treated with specific siRNAs every 3 days along with control siRNA. Data are presented as the mean  $\pm$  SD. Indicated significances are tested using Student's *t*-test analyses ( $***p < 0.001$ ). *n* = 3 biological replicates.
- D. Representative images of cells transfected with siNC (negative control) and siRNAs targeting *Yap1* and *Taz*, respectively, during the SL-to-2iL process. Scale bar, 100  $\mu$ m.
